# Supplementary material for: Surface chemistry of propanal, 2-propenol, and 1-propanol on Ru(001)
Source: Royal Society of Chemistry journal article supplement (doi:10.1039/c6cp08893g), 2017-01-01
Supplement: c6cp08893g1.pdf [file c6cp08893g1.pdf]

## Supporting Information

# Surface chemistry of propanal, 2-propenol, and 1-propanol on Ru(001)

*Dominic A. Esan and Michael Trenary \**

Department of Chemistry, University of Illinois at Chicago, 845 West Taylor Street, Chicago,  
Illinois 60607, United States

\*Corresponding author email: [mtrenary@uic.edu](mailto:mtrenary@uic.edu)

### Contents

1. TPRS Yields
2. Selected TPR spectra – before and after deconvolution
3. RAIR Spectra of 2-propenol, propanal, and 1-propanol at different exposures

## 1. TPRS Yields

The TPRS yields listed in Table S1 were calculated using a previously described approach.<sup>1</sup>

**Table S1.** Yields in units of  $\times 10^{-3}$  ML of the products observed with TPRS following exposure to 2-propanol, propanal, and 1-propanol

| Compound   | Exposure (L) | Product and Yield $\times 10^{-3}$ ML |            |          |            |         |
|------------|--------------|---------------------------------------|------------|----------|------------|---------|
|            |              | CO                                    | 2-Propanol | Propanal | 1-Propanol | Propene |
| 2-Propanol | 1.0          | 50.0                                  | 11.0       | 13.9     | 7.13       | 12.7    |
| Propanal   | 1.0          | 60.30                                 | 0          | 18.8     | 0.22       | 0       |
| 1-Propanol | 1.0          | 58.5                                  | 0          | 11.1     | 150        | 0       |

## 2. Selected TPR spectra – before and after deconvolution

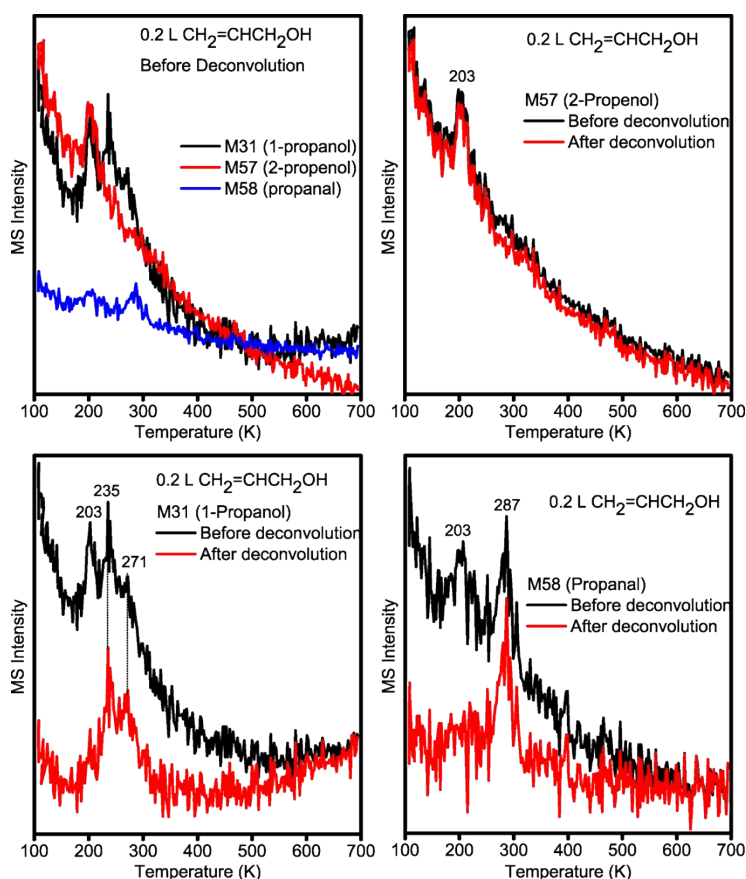

**Figure S1.** Raw and deconvoluted TPR spectra for masses 57 amu (2-propanol), 31 amu (1-propanol), and 58 amu (propanal) after exposing the Ru(001) surface to 0.2 L of 2-propanol.

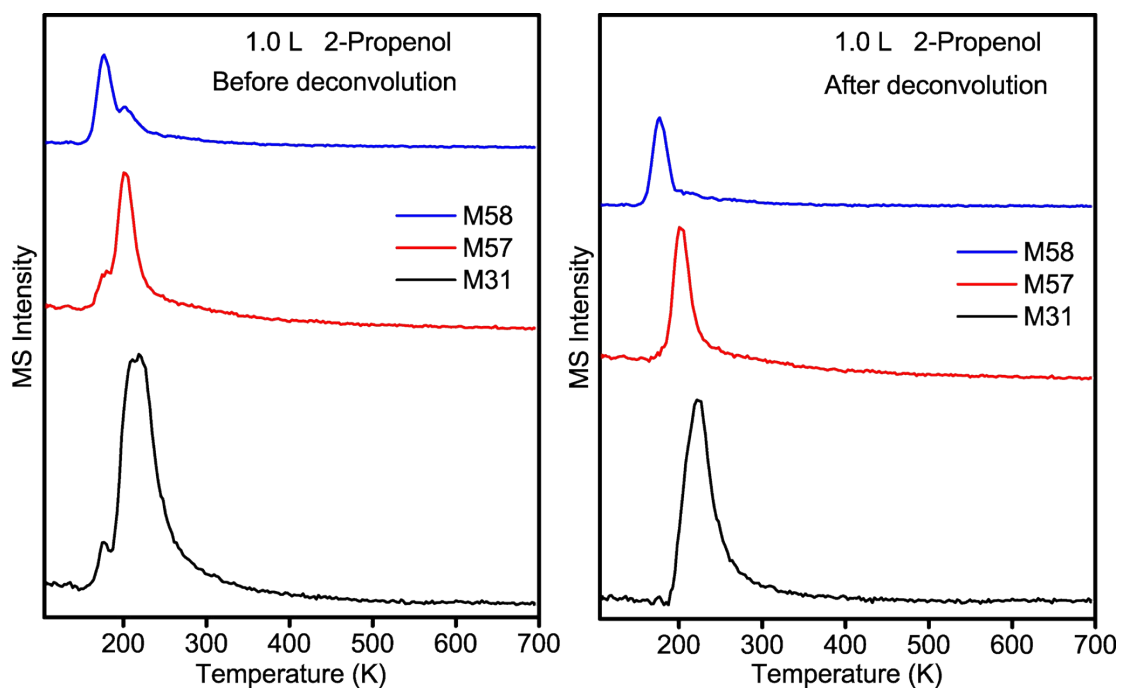

**Figure S2.** Raw and deconvoluted TPR spectra for masses 58 amu (propanal), 57 amu (2-propenol), and 31 amu (1-propanol) obtained after exposing the Ru(001) surface to 1.0 L of 2-propenol.

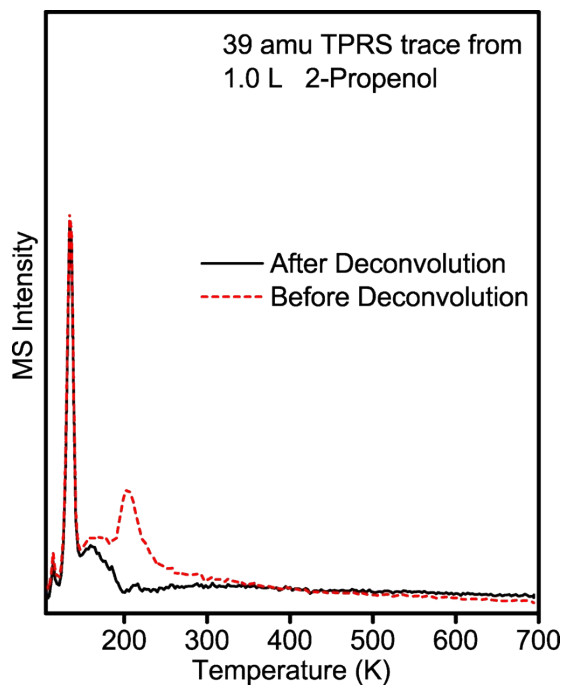

**Figure S3.** Raw and deconvoluted TPRS spectra for 39 amu (propene) obtained after exposing the Ru(001) surface to 1.0 L of 2-propenol.

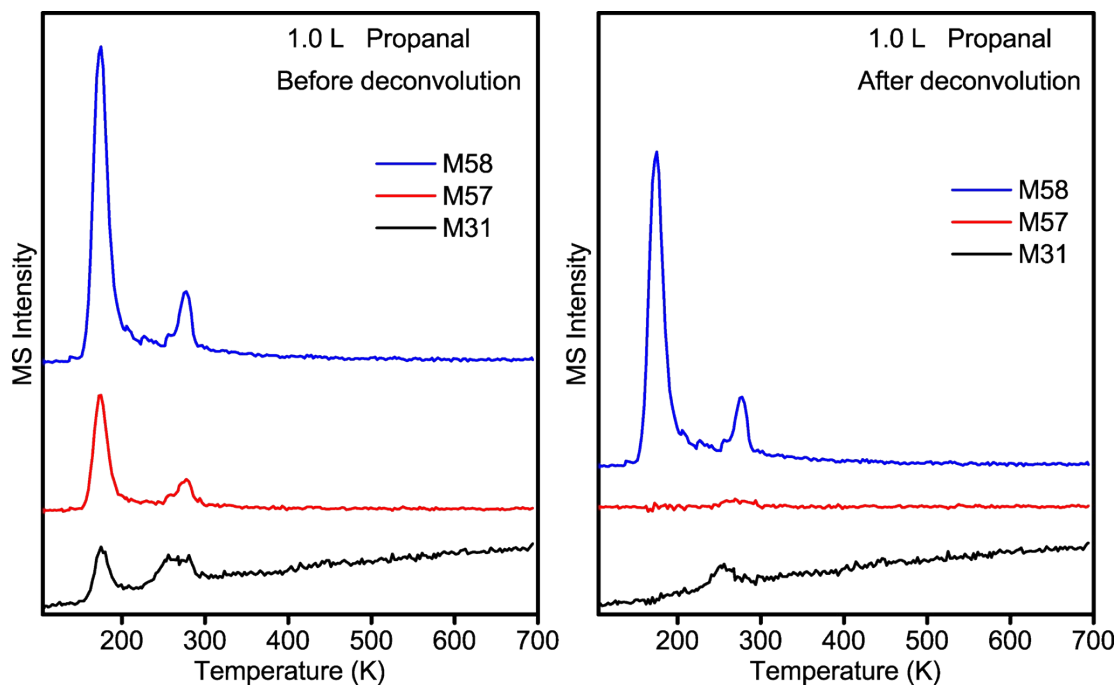

**Figure S4.** Raw and deconvoluted TPRS spectra for masses 58 amu (propanal), 57 amu (2-propanol), and 31 amu (1-propanol) obtained after exposing the Ru(001) surface to 1.0 L of propanal.

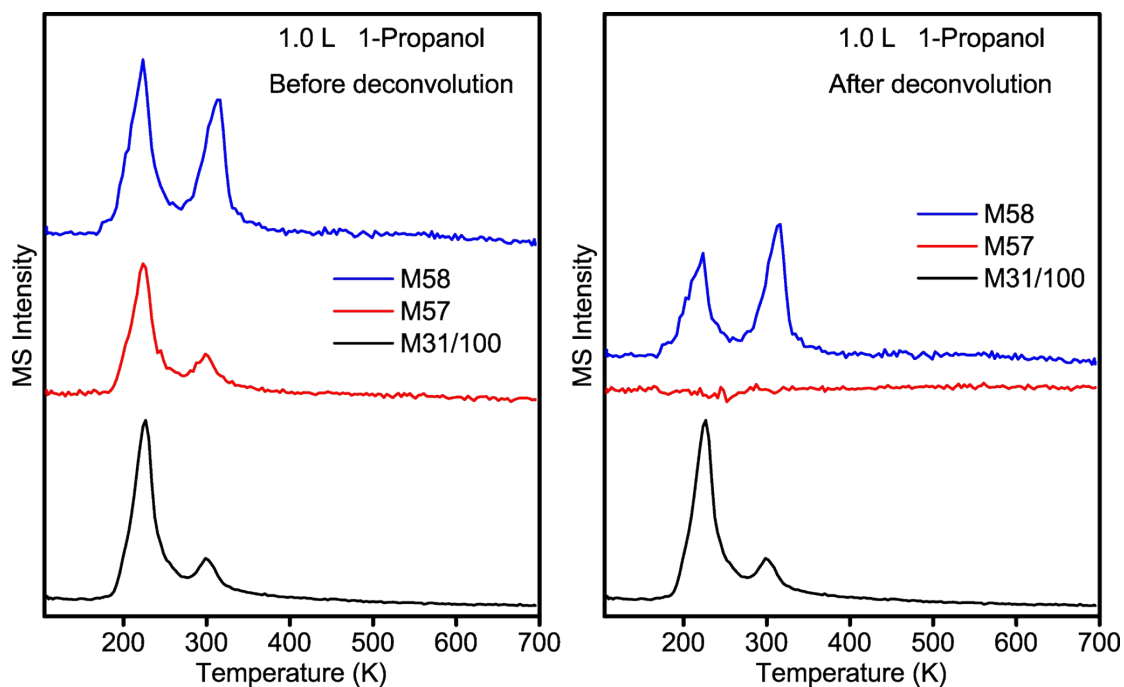

**Figure S5.** Raw and deconvoluted TPRS spectra for masses 58 amu (propanal), 57 amu (2-propanol), and 31 amu (1-propanol) obtained after exposing the Ru(001) surface to 1.0 L of 1-propanol.

3. RAIR spectra of 2-propenol, propanal, and 1-propanol at different exposures

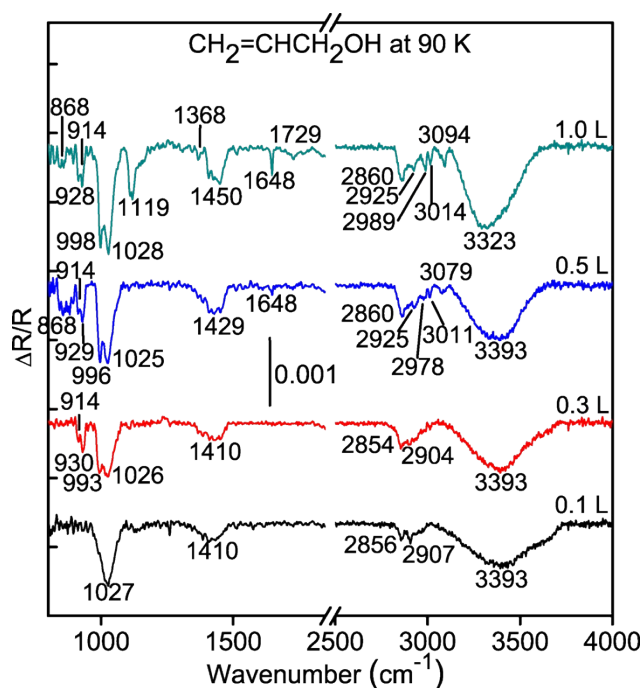

**Figure S6.** RAIR spectra of 0.1 to 1.0 L 2-propenol taken at 90 K on the clean Ru(001) surface.

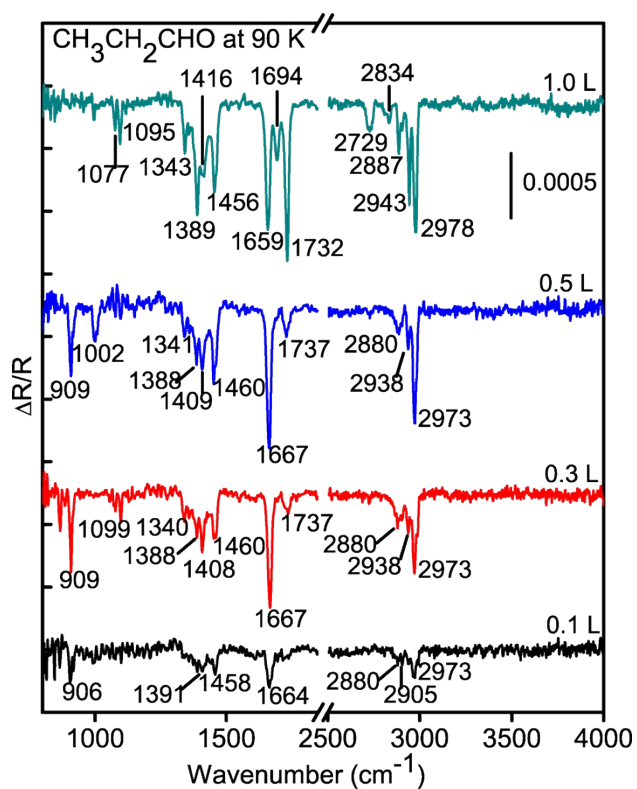

**Figure S7.** RAIR spectra of 0.1 to 1.0 L propanal taken at 90 K on the clean Ru(001) surface.

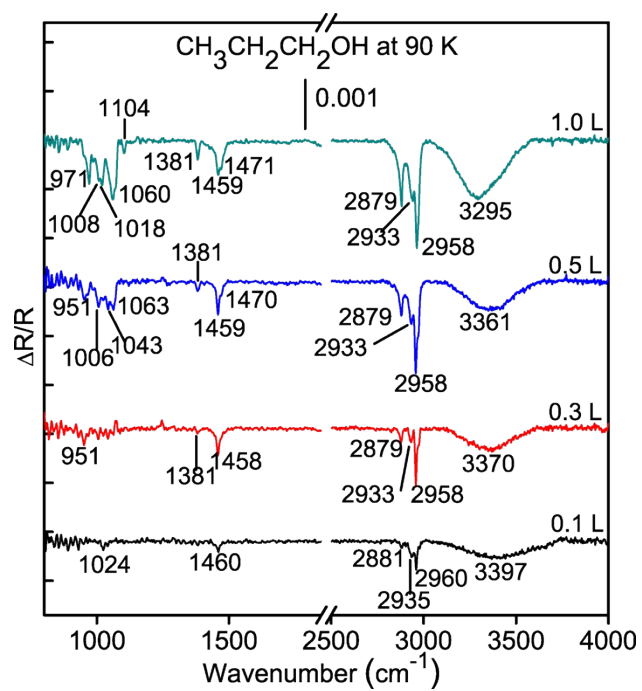

**Figure S8.** RAIR spectra of 0.1 to 1.0 L 1-propanol taken at 90 K on the clean Ru(001) surface.

## References

1. D. A. Esan, Y. Ren, X. Feng and M. Trenary, *J. Phys. Chem. C*, 2016, DOI: 10.1021/acs.jpcc.6b12678.
